# Supplementary material for: Prognostic Value of ER and PgR Expression and the Impact of Multi-clonal Expression for Recurrence in Ductal Carcinoma in situ : Results from the UK/ANZ DCIS Trial
Source: Oxford University Press journal article supplement (doi:10.1158/1078-0432.ccr-20-4635), 2021-03-16
Supplement: 10780432ccr204635-sup-256279_2_supp_6961751_qpntdj.docx [file 10780432ccr204635-sup-256279_2_supp_6961751_qpntdj.docx]

**Supplementary Figure S1: CONSORT diagram summarising the treatment allocation in the UK/ANZ DCIS trial, and distribution of patients in the biomarker study subset (BSS1) and inclusion in the nested case-control study.**

RT - radiotherapy; FFPET - Formalin-fixed paraffin embedded tissue; NCC - Nested Case-Control study; ER - Estrogen receptor; PgR - progesterone receptor.
